# Supplementary material
Source: Springer Nature journal article supplement (https://www.springermedizin.de/resource/supplementary/12958_2013_1203_MOESM2_ESM.pdf/9567052)

mRNA expression  
(arbitrary units)

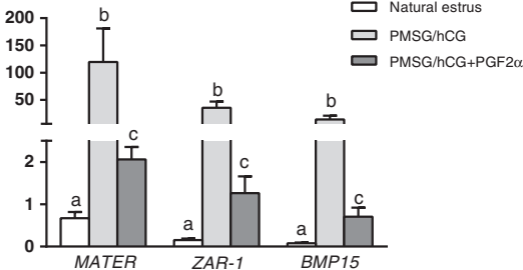

Supplement: MOESM2 [file 9567052]
